# Supplementary material
Source: Frontiers journal article supplement (https://www.frontiersin.org/articles/2151)
Supplement: Add+File+4+Table+Site+Notes.xls [file Add+File+4+Table+Site+Notes.xls]

## Sheet: qrySiteData
Site	Site Notes
EGS 1	There have been 3 EGS cases in 9 years, all horses being grazed in one particular field, at the bottom of a slope on chalk downland. Clay soil. It was commented that the farmer fertilises the field at the top of the hill (another property), and it is thought likely that some run-off affects the bottom field. Pasture management: fields fertilised about 4 years previously (2003); regularly sprayed …
EGS 2	2 fields away from sea (< 1/4 mile). Had a cat that died from dysautonomia 2 years ago (lots of cats kept at farm, but only the one got it). Sea birds often come in & leave guano - usually more in winter when weather bad. Pasture a carpet of buttercups, R.acris and R. bulbosus. Not been sprayed for at least 50 years. Ragwort common. Soil loam acid on gravel, free-draining.
EGS 3	Construction work had recently been going on adjacent to EGS field. Last year field had been grazed by sheep. No pasture management. 12 acre site, once an iron age settlement. A Shetland Pony in the village approx 1.5 miles away also lost its life to grass sickness 1/4/2007 (a few days before). There had been 4 or 5 cases of EGS in the village that year (by mid-May when samples collected).
EGS 4	Two paddocks - one overgrazed, and the other paddock with large acreage. Long grass. Subject to flooding from nearby river. Extension had been recently built - soil disturbance.
EGS 5	Field had been sprayed for ragwort in the past, but now grazed with sheep (a sheep-gate installed). A number of ponies kept in the field (>12 acres), which sloped and was waterlogged in places. Sedges growing in waterlogged area. Pond with algae - a water source for ponies. One pony exhibited photosensitivity on muzzle, possibly from Ranunculus?
EGS 6	> 10 EGS cases over 30 years. Buttercups abundant.Some horses with photosentisisation to muzzle. Owners did not realise could be caused by buttercups (horses prescribed steroidal cream by vet). Some small fungi growing in paddocks. Horses all regularly wormed with Ivermectin. 2 youngsters had been lost to EGS almost exactly to the year in May. A mare also aborted her foal around the same time in …
EGS 7	At least one EGS case per year since the 1980's, although last case about 3 years ago (2004). Was losing about 20% of horses, so not taking many visiting broodmares. Fields had been fertilised. Soil low in Selenium and copper. Noted that 'Arab-types' were more prone to the disease than 'natural-types' (had lost far more show ponies than cobs to EGS). EGS decimated youngsters, not one filly surviv…
EGS 8	Ragwort found on field - pulled out by hand. Pasture never sprayed as organically certified. Grazed sheep previously (had 16 during foot and mouth outbreak). Had planted hedges but due to gaps in hedge currently difficult to co-graze horses with ruminants. Red clover had been sown in 1998, mistakenly to excess. Some fungi growing in field. A number of mole casts - soil disturbance. Horses that we…
EGS 9	Farm - mixed arable and grass, and livery yard. 4 EGS cases on premises, one EGS case adjacent field belonging to neighbour. Family had been working farm for over 150 years, and no EGS cases prior to 2007. In the area EGS cases are usually infrequent and sporadic. Sewage spill onto field Aug/Sept 2006 (a few months prior to outbreak), with raw sewage leaking into stream. Owners concerned that nit…
EGS 10	Lots of horses co-grazing in one paddock. The two horses that went down with EGS in 2007 had been on the co-grazed paddock for a year before being moved to another field, which had been grazed with sheep over winter. There had been another 2 EGS cases a few years prior at the site. Lots of soil disturbance. Spray for buttercups. River nearby - on flood plain, although not flooded in at least 11 y…
EGS 11	5 horses grazed on paddock, which was approx. 12 acres. Paddock was spot sprayed for ragwort and dock (using 'Roundup'), although had not been done recently. Had been fertilised regularly for years, using rabbit droppings (owners used to breed rabbits). A lot of fungi occur in paddock in Spring. Abundance of buttercups - noticeably more than in previous years. Septic tank had pipes going into mid…
EGS 12	The owners had been at the farm for 10 years and this (2007) was the first outbreak of EGS. Field associated with cases had been harrowed, but no fertiliser or sprays used. Sheep have grazed on site since. Lots of buttercups. It was considered better grazing this year than previous years. Ponies had access to hay, so fields not close-cropped. A considerable number of pheasants were on land this y…
EGS 13	Two confirmed EGS cases occurred in horses grazing in the same field, which is not always used. Disturbed soil, had hay and machinery left in field. Used to be free-draining but now boggy. Loam to sandy-loam soil. Had problems with cereal earworm (caused by Fusarium fungus). A few years previously in winter had lost a horse to ragwort poisoning (as diagnosed by vet), however, owner commented that…
EGS 14	Family-owned paddocks, about 4 acres. Heavy clay soil, quite water-logged with rushes (Juncus spp.). Lots of creeping buttercup and docks. 3 EGS cases on same pasture - 2 acute, 1 chronic.
EGS 15	There had been a cluster of cases in the area. Tippings from the motorway spread on land (which is adjacent to motorway) during 1970's. Three fields where horses from livery yard grazed - first field is permanent pasture, abundant with buttercups; second field is also permanent pasture, ploughed in 1960s; third field has top soil from motorway tippings. More ragwort than used to have. Fields have…
EGS 16	Paddocks close to two motorways. Some had been grazed by cattle about 20 years ago. Paddocks not fertilised or harrowed. Manually 'poo-picked'. A cat, and two foxes (a cub and adult) had been found dead on the land, and a dog kept there got very sick.
EGS 17	There had been several cases in the area in May 2006, known confirmed EGS case in Sheltand Ponies and an eventer horse. Suspected case on site end of summer 2005 (when grass short, a period of hot weather was followed by wet and cold) - horse found dead in a field, no symptoms, just sudden death (was buried in field). Area associated with pre-historic and historic IRON industry. Clay soil. Site u…
EGS 18	Paddocks very close to (< 1mile from) motorway. There had been recent soil disturbance - 6 weeks prior to EGS cases there had beeen excavation work on adjoining piece of land. Fields had been harrowed very recently - 2-3 weeks prior to cases. Also mole hills in field. Field waterlogged, with one corner a large puddle (from which horses may have drunk). Field had not been fertilised since the spri…
EGS 19	16 acres of fields on large estate. Nothing had been done to EGS field for a long time. Sheep had been grazed on field in the past (>2 years ago). Land had never been intensively farmed. Archaeological evidence of metal mining activity in area. Possible ancient mine shafts on estate. A pipe had been installed with resulting soil disturbance prior to EGS cases (digging was down-hill from EGS field…
EGS 20	Field harrowed, fertilised and rolled in April. No weed killer applied for current or previous year. The horses that graze on the field were moved there in February. Droppings are removed mechanically once or twice a year (but probably not since last year - 2007).
EGS 21	Racehorses grazed for 10-15 mins per day on short, manicured grass, which had not been sprayed for over a year prior to EGS case. Had been sprayed with herbicide (Bastion*T) against broad-leaved weeds during period between EGS case and site visit. Creeping buttercups found growing in abundance in patches on the ground where horse that contracted EGS grazed. Race-track adjacent to where horses gra…
EGS 22	Field had been rented for 9 years. Faecal matter mechanically removed. Pasture had buttercups growing in abundance - these sprayed. Ragwort manually pulled up. Not many docks. Next to river - when really wet, river floods. Soil disruption - landowner had moved fence boundary, using a JCB to dig holes. Septic tank in field - a new septic tank had been installed in field in adjacent property. There…
EGS 23	Pasture management: harrowed, rolled and reseeded - not sprayed. Paddock had been newly re-seeded with pasture mix seed Easter 07. May 08 was the first time since then that it had been grazed. Horse faeces removed daily (by hand). No obvious buttercup, docks or ragwort, but quite abundant in clover. (NB site not visited by LSoP researcher, info given verbally over phone. Of note horse had blister…
CONTROL 1
CONTROL 2
CONTROL 3
CONTROL 4
CONTROL 5
CONTROL 6
CONTROL 7	Paddock never sprayed. 'Poo-pick' manually.
CONTROL 8
CONTROL 9	Paddock top and harrowed. Have sprayed for weeds in the past, about 6 years ago.
CONTROL 10	Buttercups are VERY abundant! The area had not been grazed recently, so lush and lovely 'grass' but with a lot of buttercups - in some parts dominant - in other parts about 20-30% coverage or less. No knowledge of history of mining in the area, which used to be a dairy farm. In one corner near the entrance some bare soil had been deposited and this seems to be from some building work.
CONTROL 11	The area had been grazed quite heavily and had occasional buttercups (not at all abundant) and in some corners ragweed. The site is sprayed for ragweed. Soil a mix of clay and sand. Despite the recent rain, was pretty dry. No reported history of mining in the area.
